# Supplementary material for: Untargeted and Targeted LC-MS/MS Based Metabolomics Study on In Vitro Culture of Phaeoacremonium Species
Source: MDPI journal article supplement (doi:10.3390/jof8010055), 2022-01-06
Supplement: s1 [file s1]

# Untargeted and targeted LC-MS/MS based metabolomics study on *in vitro* culture of *Phaeoacremonium* species

Pierluigi Reveglia<sup>1</sup>, Maria Luisa Raimondo<sup>2</sup>, Marco Masi<sup>3</sup>, Alessio Cimmino<sup>3</sup>, Genoveffa Nuzzo<sup>4</sup>, Gaetano Corso<sup>1</sup>, Antonia Carlucci<sup>2\*</sup>, Angelo Fontana<sup>4,5</sup>, Antonio Evidente<sup>3\*</sup>

<sup>1</sup>Department of Clinical and Experimental Medicine, University of Foggia, Viale Pinto 1, 71121 Foggia, Italy

<sup>2</sup>Department of Agricultural Sciences, Food, Natural Resources and Engineering, Via Napoli 25 - 71122 Foggia, Italy

<sup>3</sup>Department of Chemical Sciences, University of Napoli Federico II, Complesso Universitario Monte Sant'Angelo, Via Cintia 4, 80126 Napoli, Italy.

<sup>4</sup>Institute of Bio-Molecular Chemistry, Consiglio Nazionale delle Ricerche (ICB-CNR), Via Campi Flegrei 34, 80078 Pozzuoli, Italy;

<sup>5</sup> Laboratory of Bio-Organic Chemistry and Chemical Biology, Department of Biology, University of Napoli "Federico II", Via Cupa Nuova Cinthia 21, 80126 Napoli, Italy

\* Corresponding authors

**Supplementary material**

**Figure S1.** (a) XIC of MRM transitions of scytalone (1); (b) XIC of MRM transitions of isosclerone (2); (c) selected MRM transitions for scytalone (1); (d) selected MRM transitions for isosclerone (2).

**Figure S2.** Hierarchical Clustering result shown as dendrogram. In red the extracts at unmodified pH (UpH), in green the extracts after acidification (pH 2) with formic acid.

**Table S1.** Calibration curves, correlation coefficient (r), imprecision, inaccuracy, LOD and LOQ value for scytalone (1) and isosclerone (2) quantification.

**Table S2.** Within-day imprecision (CV%) and inaccuracy (%) of results obtained by measuring two QC levels 6 times within one day (n=6).

**Table S3.** Between-day imprecision (CV%) and inaccuracy (%) of results obtained by measuring two QC levels once a day for five days (n=5).

**Table S4.** Workflow parameters Mzmine 2.

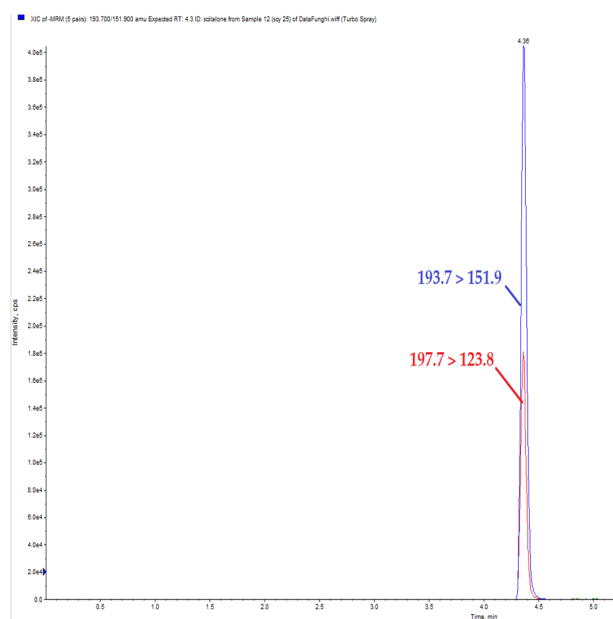

(a)

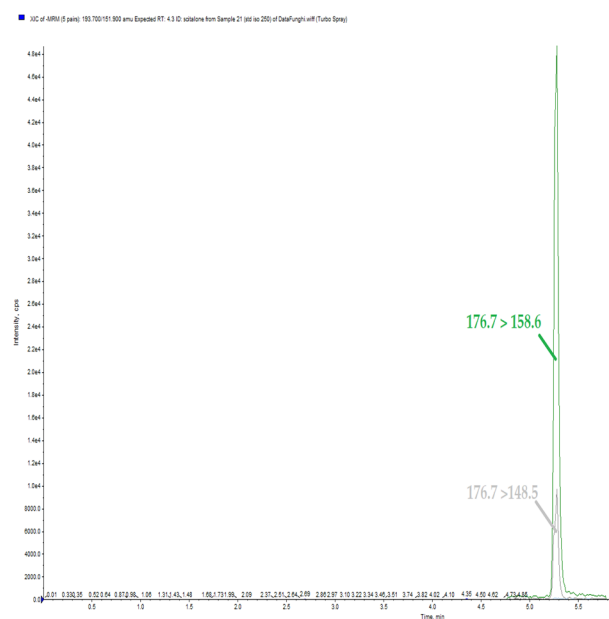

(b)

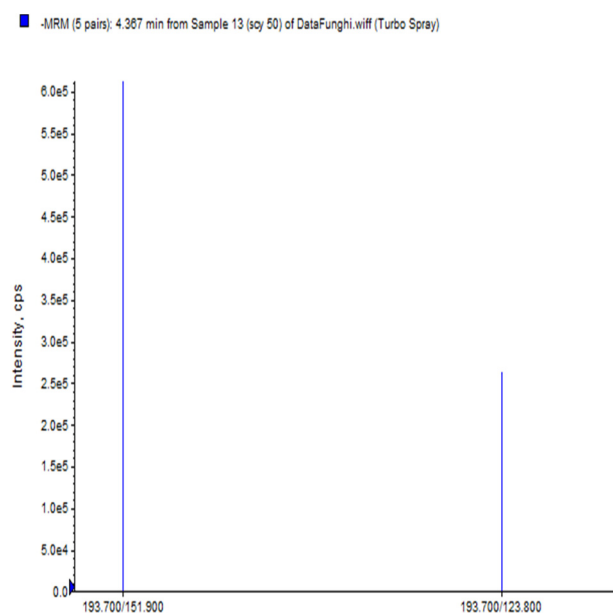

(a)

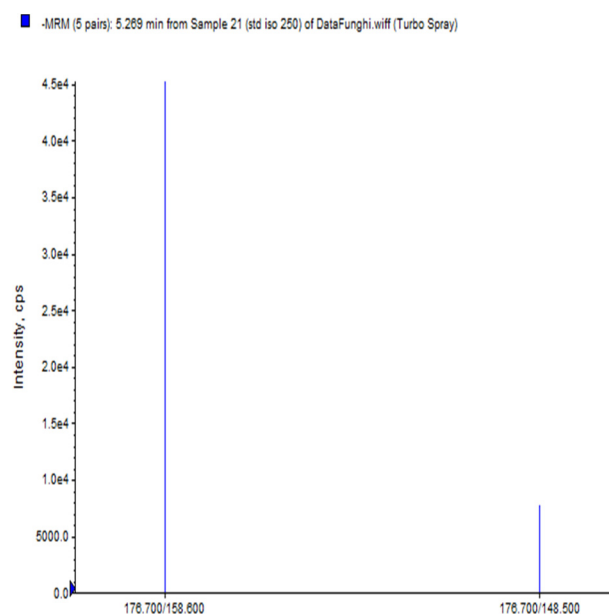

(b)

**Figure S1.** (a) XIC of MRM transitions of scytalone (1); (b) XIC of MRM transitions of isosclerone (2); (c) selected MRM transitions for scytalone (1); (d) selected MRM transitions for isosclerone (2).

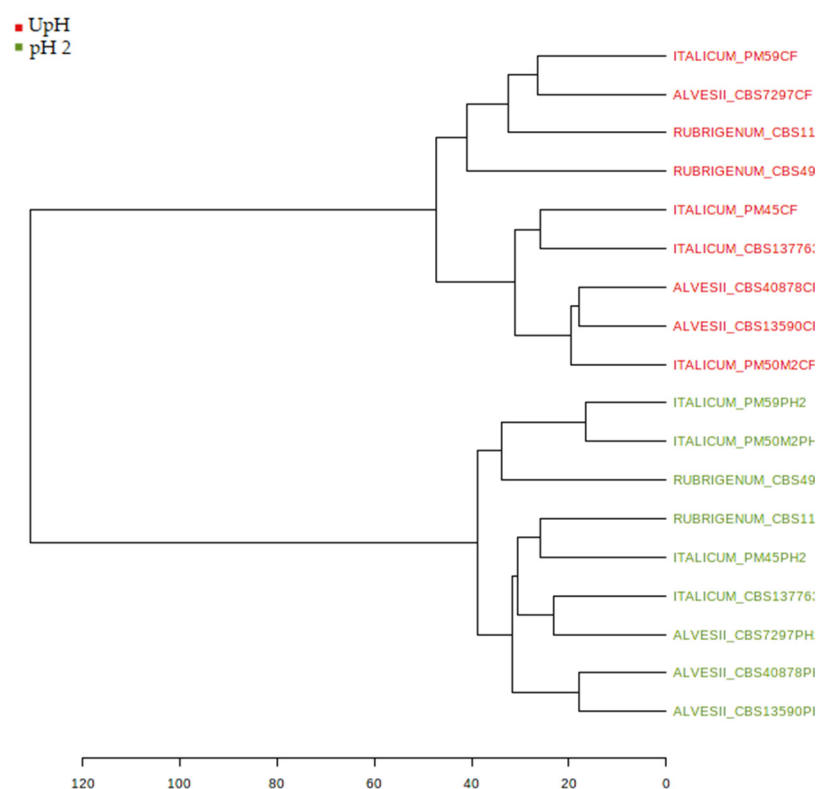

**Figure S2.** Hierarchical Clustering result shown as dendrogram. In red the extracts at unmodified pH (UpH), in green the extracts after acidification (pH 2) with formic acid

**Table S1.** Calibration curves, correlation coefficient (r), imprecision, inaccuracy, LOD and LOQ value for scytalone (1) and isosclerone (2) quantification.

| P                                                                 | LOD  | LOQ   | Standard concentrations<br>(µg/mL) | 1     | 5     | 10    | 15     | 25     |
|-------------------------------------------------------------------|------|-------|------------------------------------|-------|-------|-------|--------|--------|
| scytalone (1)<br>$y = 0.23380x + 0.02331$<br>$r = 0.99904$        | 0.01 | 0.52  | Mean                               | 0.97  | 5.16  | 11.10 | 15.49  | 24.87  |
|                                                                   |      |       | Imprecision <sup>a</sup>           | 0.9   | 9.5   | 3.0   | 1.5    | 5.7    |
|                                                                   |      |       | Inaccuracy <sup>b</sup>            | -2.6  | 3.2   | 11.0  | 3.3    | -0.5   |
|                                                                   |      |       | Standard concentrations<br>(µg/mL) | 15    | 30    | 60    | 150    | 250    |
| isosclerone (2)<br>$y = 650.00401x - 4755.59055$<br>$r = 0.99376$ | 3.99 | 10.50 | Mean                               | 15.82 | 29.34 | 59.17 | 134.15 | 266.03 |
|                                                                   |      |       | Imprecision <sup>a</sup>           | 7.7   | 4.1   | 6.2   | 7.9    | 5.6    |
|                                                                   |      |       | Inaccuracy <sup>b</sup>            | 5.4   | -2.2  | -1.4  | -10.6  | -6.4   |

a Expressed as coefficient of variation (CV%): (standard deviation/mean) x 100. b Expressed as % difference: [(concentration calculated – concentration expected)/ concentration expected] x 100.

**Table S2.** Within-day imprecision (CV%) and inaccuracy (%) of results obtained by measuring two QC levels 6 times within one day (n=6).

| Peptide         | Expected<br>Concentration<br>(µg/mL) | Calculated<br>Concentration<br>(µg/mL) | Imprecision<br>(CV%) | Inaccuracy<br>(%) |
|-----------------|--------------------------------------|----------------------------------------|----------------------|-------------------|
| scytalone (1)   | 7                                    | 6.6                                    | 4.2                  | -5.7              |
|                 | 20                                   | 21.1                                   | 2.2                  | 5.5               |
| isosclerone (2) | 35                                   | 34.7                                   | 3.1                  | -0.8              |
|                 | 100                                  | 99.8                                   | 1.9                  | -0.2              |

**Table S3.** Between-day imprecision (CV%) and inaccuracy (%) of results obtained by measuring two QC levels once a day for five days (n=5).

| Peptide            | Expected<br>Concentration<br>(µg/mL) | Calculated<br>Concentration<br>(µg/mL) | Imprecision<br>(CV%) | Inaccuracy<br>(%) |
|--------------------|--------------------------------------|----------------------------------------|----------------------|-------------------|
| scytalone (1)      | 7                                    | 7.1                                    | 5.6                  | 1.4               |
|                    | 20                                   | 20.35                                  | 7.6                  | 1.75              |
| isosclerone<br>(2) | 35                                   | 35.8                                   | 6.3                  | 2.3               |
|                    | 100                                  | 101.8                                  | 2.0                  | 1.8               |

**Table S4.** Workflow parameters Mzmine 2.

| <b>Mass detection</b>             | <b>Parameters</b>   |
|-----------------------------------|---------------------|
| mass detector                     | exact mass          |
| noise level                       | 1.0x10 <sup>3</sup> |
| <b>ADAP chromatogram builder</b>  | <b>Parameters</b>   |
| minimum group size                | 5                   |
| group intensity threshold         | 1.0x10 <sup>4</sup> |
| minimum highest intensity         | 1.0x10 <sup>3</sup> |
| m/z tolerance                     | 0.001 m/z - 5 ppm   |
| <b>Smoothing</b>                  | <b>Parameters</b>   |
| Filter width                      | 5                   |
| <b>Chromatogram deconvolution</b> | <b>Parameters</b>   |
| algorithm                         | Wavelets (ADAP)     |
| m/z centre calculation            | AUTO                |
| S/N threshold                     | 5                   |
| S/N estimator                     | Intensity window SN |
| Min feature height                | 1.0x10 <sup>3</sup> |
| Coefficient/area threshold        | 50                  |
| Peak duration range               | 0.05 - 10           |
| RT wavelet range                  | 0.00 – 0.5          |
| <b>Deisotoping</b>                |                     |
| m/z tolerance                     | 0.001 m/z - 5 ppm   |
| RT tolerance                      | 0.1 absolute (min)  |
| maximum charge                    | 2                   |
| representative isotope            | most intense        |
| <b>RANSAC Aligner</b>             | <b>Parameters</b>   |
| m/z tolerance                     | 0.001 m/z -5 ppm    |
| RT tolerance                      | 1 min               |
| RT tolerance after correction     | 0.20                |
| RANSAC iteration                  | 0                   |
| Minimum number of points          | 50%                 |
| Threshold value                   | 1                   |
| <b>Gap filling</b>                | <b>Parameters</b>   |
| m/z tolerance                     | 0.001 m/z - 5 ppm   |
| intensity tolerance               | 1%                  |
| Retention time tolerance          | 0.20 min            |
